# Supplementary material for: Safety and Efficacy of Hypofractionated Stereotactic Radiotherapy with Anlotinib Targeted Therapy for Glioblastoma at the First Recurrence: A Preliminary Report
Source: MDPI journal article supplement (doi:10.3390/brainsci12040471), 2022-04-02
Supplement: s1 [file s1]

Supplementary Materials:

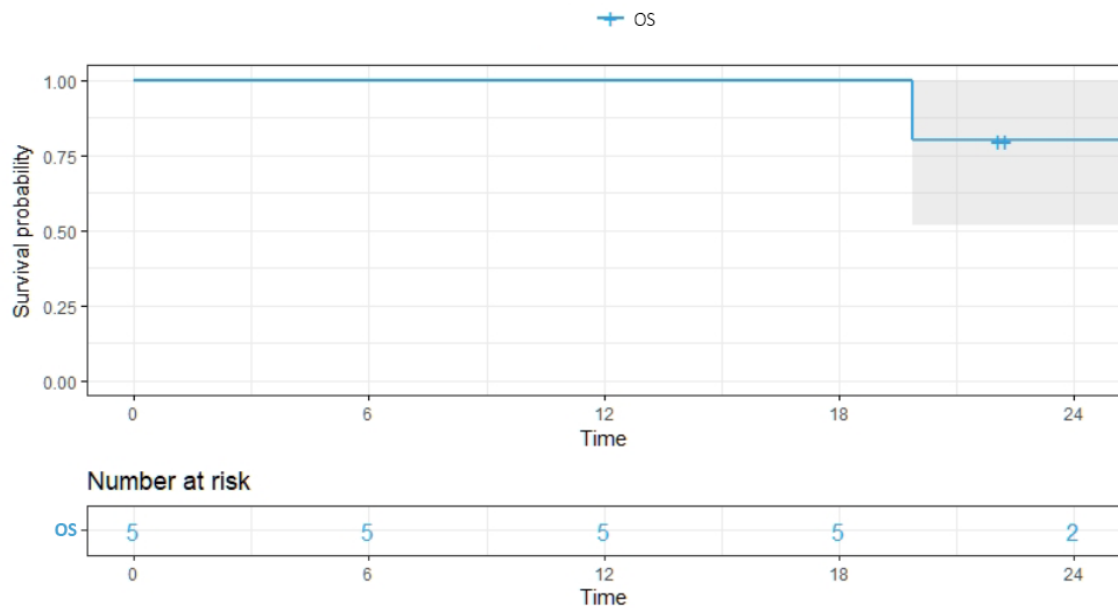

Figure S1: Overall survival (OS) from salvage treatment of all rHGG patients (calculated with the Kaplan-Meier method).

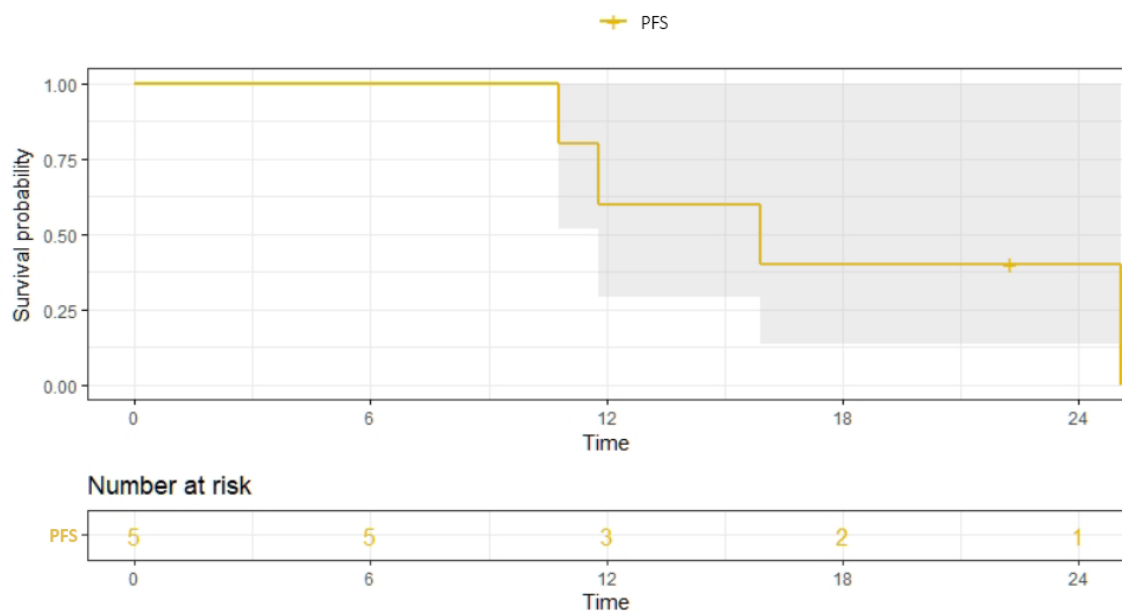

Figure S2: Progression-free survival (PFS) from salvage treatment of all rHGG patients (calculated with the Kaplan-Meier method).
